# Supplementary material
Source: PubMed Central journal article supplement (PMC11082750)
Supplement: jama-e244783-s003.pdf [file jama-e244783-s003.pdf]

Jabbour E, Kantarjian HM, Aldoss I, et al. Ponatinib vs imatinib in frontline Philadelphia chromosome–positive acute lymphoblastic leukemia: a randomized clinical trial. *JAMA*. Published online May 9, 2024. doi:10.1001/jama.2024.4783

## **Data Sharing Statement**

### **Data**

**Data available:** No

### **Additional Information**

**Explanation for why data not available:** See Supplement 3.
